1 ***Leptospira* infection in rural areas of Urabá region, Colombia: a prospective study**

2  
3 Juan C. Quintero-Vélez<sup>1,2,3,4</sup>, Juan D. Rodas G<sup>1</sup>, Carlos Rojas A<sup>4</sup>, Albert I. Ko<sup>3,5</sup>, Elsio A.  
4 Wunder Jr.<sup>3,5</sup>

5  
6  
7 <sup>1</sup>Grupo de Investigación Ciencias Veterinarias Centauro, Universidad de Antioquia, Medellín,  
8 Colombia.

9 <sup>2</sup>Grupo de Investigación Microbiología Básica y Aplicada, Universidad de Antioquia, Medellín,  
10 Colombia.

11 <sup>3</sup>Department of Epidemiology of Microbial Diseases, Yale School of Public Health, New Haven,  
12 CT, 06510; United States.

13 <sup>4</sup>Grupo de Epidemiología, Universidad de Antioquia, Medellín, Colombia.

14 <sup>5</sup>Gonçalo Moniz Institute, Oswaldo Cruz Foundation; Brazilian Ministry of Health; Salvador,  
15 BA, 40296-710; Brazil.

16  
17 **ABSTRACT**

18 The objective of this study was to analyze the eco-epidemiological aspects of *Leptospira*  
19 seroprevalence and seroincidence, and its associated factors in two municipalities of northwest  
20 Colombia. A prospective study was performed in rural areas of Urabá, Antioquia, Colombia.  
21 The study enrolled 597 people between November-2015 and January-2016, of which 274 people  
22 were followed up one year later. Serologic testing was performed by a microscopic  
23 agglutination. The outcomes were seroprevalent and seroincident cases, and the main exposure  
24 was an outdoor occupation. A binary and mixed-effect multinomial logistic regression model  
25 was used to estimate factors associated with seroprevalent or seroincident cases of *Leptospira*  
26 infection. The overall *Leptospira* seroprevalence was 27.81% (95%CI:23.62–32.49) and the  
27 overall cumulative seroincidence for *Leptospira* was 14.60% (95%CI:10.33–20.23).  
28 Multivariable analysis showed that factors associated with *L. interrogans* serogroups  
29 seropositivity were outdoor occupation, male gender, older age, the presence of dirt soil in the  
30 household, and the presence of piglets and opossums. It also showed that factors associated with  
31 other *Leptospira* species serogroups were the presence of pit latrines and of turkeys. In addition,  
32 the multivariable model of seroincident cases of *L. interrogans* serogroups evidenced outdoor  
33 occupations, the presence of rats, and corn cultivation as risk factors. Likewise, the multivariable  
34 model for seroincident cases of other *Leptospira* species showed that the presence of hunting  
35 canines and cassava cultivation were risk factors. We found specific factors associated with the

36 transmission of *Leptospira* serogroups contribute to the understanding of the epidemiology of  
37 *Leptospira* infection in rural areas of Urabá, Colombia.

38

### 39 **Keywords**

40 *Leptospira*, leptospirosis, Colombia, Urabá, seroprevalence, seroincidence

41

### 42 **AUTHOR SUMMARY**

43 More than one million cases of leptospirosis occur each year, and about 60,000 people die of the  
44 disease worldwide. Leptospirosis is a zoonotic bacterial disease imparting its heaviest burden on  
45 resource-poor populations. It is also a major cause of economic loss in farm animals causing fetal  
46 infections, abortion, stillbirths, infertility, and increased culling rate. Leptospire also  
47 contaminate surface waters and survive in mud and moist soils, facilitating transmission among  
48 hosts. This complex cycle of transmission makes the disease a suitable model for a one-health  
49 approach. This is a prospective study conducted in rural areas of Colombia aimed at identifying  
50 the factors associated with seroprevalent and seroincident *Leptospira* cases. In addition, the  
51 results showed that the presence of synanthropic and domestic animals, the characteristics of  
52 household materials, and individual variables were factors associated with *Leptospira*  
53 seropositivity. This study clarifies the epidemiology of *Leptospira* infection and could improve  
54 the surveillance program in Colombia, especially in rural areas.

55

56

### 57 **INTRODUCTION**

58

59 Leptospirosis is a zoonotic bacterial disease that burdens resource-poor populations the most <sup>1</sup>.  
60 The disease is caused by pathogenic species of the genus *Leptospira*, which comprises 64 species  
61 <sup>2</sup>. The incidence rate of leptospirosis worldwide ranges from 0.10 to 975 cases per 100,000  
62 population, and new cases are more frequent in tropical countries <sup>3,4</sup>. Environmental (rainfall,  
63 seasons, and erosions) and ecological factors, such as the relationship between human-domestic  
64 animals and wild mammals, and socio-cultural characteristics, including outdoor occupations and  
65 practices, increase the number of leptospirosis cases <sup>5-8</sup>.

66

67 Leptospirosis has been a mandatory notifiable disease in Colombia since 2007 <sup>9</sup>, with a reported  
68 case fatality rate of between 1.40% and 2.24% during the period 2016–2018 <sup>10-12</sup>. During the  
69 same period, 1,885 cases of the disease were confirmed; a significant proportion (18.30%) of

70 these cases occurred in the Department of Antioquia, especially in the municipalities of Turbo  
71 and Apartadó in the Urabá region<sup>10-12</sup>. In this region, the seroprevalence of *Leptospira* was  
72 estimated to be 12.50% (95% CI 10.01–15.50) in 2007, with the highest seropositivity proportion  
73 found in Carepa (27.3%), Necoclí, and San Pedro de Urabá (25.00%), followed by Apartadó  
74 (14.80%), Turbo (11.80%), and Chigorodó (7.50%)<sup>13</sup>. However, higher seropositivity was found  
75 later in Necoclí (35.60%) in 2009, indicating a potential increase in the transmission in the  
76 region<sup>14</sup>. Among patients with febrile syndrome studied between 2007 and 2008 in Apartadó  
77 and Turbo, 31 cases (14.1%) were diagnosed with leptospirosis, and serogroups Tarassovi and  
78 Semarang were identified in those patients<sup>15</sup>. Moreover, studies conducted in the Urabá region  
79 have identified socio-ecological factors associated with *L. interrogans* exposure<sup>14</sup>.

80  
81 Previous studies have shown that cases of leptospirosis are occurring in the Urabá region<sup>16</sup>. The  
82 Urabá region, especially rural areas, has conditions favoring the circulation of *Leptospira* such as  
83 the presence of synanthropic rodents in households, the presence of wild animals in  
84 peridomiciliary areas, keeping domestic animals under unsanitary conditions, occupations with a  
85 potential risk of infection (agriculture), and inappropriate water supply and sewage disposal  
86 methods<sup>17-19</sup>. Besides, the failure to report cases of leptospirosis in Urabá has been related to  
87 poor recognition of areas and people at risk of presenting the disease<sup>16,20</sup>. However, additional  
88 analytical studies aimed at identifying factors associated with the seroprevalence and  
89 seroincidence of infection with different *Leptospira* serogroups have rarely been conducted in  
90 Colombia.

91  
92 The overall objective of this study was to analyze the eco-epidemiological aspects of *Leptospira*  
93 seroprevalence and the incidence and associated risk factors of infection in two municipalities of  
94 northwest Colombia. Through a prospective study analysis, we were able to identify socio-  
95 ecological factors (human, wild, and domestic animal relationships, age, occupation, land use,  
96 and household characteristics) related to *Leptospira* seropositivity in humans and determine the  
97 seroincidence of *Leptospira* infection among individuals living in those areas. Our study  
98 provides a better understanding of the epidemiology of *Leptospira* infection in the region that  
99 can be expanded to similar areas in Colombia and throughout the world. It can also help guide  
100 public health measures to help intervention strategies and reduce the transmission of  
101 leptospirosis.

102

103 **MATERIALS AND METHODS**

104

## 105 **Study design**

106 A prospective study was conducted in two rural areas of Urabá, Colombia, in the localities of  
107 Alto de Mulatos, Turbo (8°08'12.5"N 76°33'01.7"W), and Las Changas, Necoclí (8°32'52.5"N  
108 76°34'23.7"W) (Figure 1) located 356 and 418 km from Medellín city, the capital city of the  
109 Department of Antioquia. Between November 2015 and January 2016, individuals of both  
110 genders residing in the study area who agreed to sign the informed consent were included in the  
111 baseline study (T0). People were excluded if they planned to move out from the study area  
112 within the following year and if they were suspected of being affiliated with illegal armed  
113 groups (this information was contributed by a research team that inhabited the study region). The  
114 same participants were followed up 12 months later, between November 2016 and January 2017  
115 (T12).

116

## 117 **Sampling design**

118 Nine hamlets, five in Alto de Mulatos and four in Las Changas, were selected according to the  
119 ecological factors associated with infectious tropical diseases (the presence of wild mammals,  
120 the characteristics of the water supplies, and the presence of mosquitos and ticks, among others),  
121 the number of households, the presence of illegal armed groups, and the distance to urban centers  
122 (because of study logistics). This study constitutes a secondary prospective analysis of the main  
123 study designed to estimate the seroprevalence against agents of the *Rickettsia* genus<sup>21</sup>. However,  
124 the proportion of seropositivity used for sample size estimation and the sampling design allowed  
125 other outcomes to be strongly and confidently evaluated. A complex random sampling was  
126 carried out with households as the sample units and their inhabitants as the analysis units. Based  
127 on the 461 households and 1,915 inhabitants identified in the census tract, a sample size of 208  
128 households was estimated, using a 95% level of confidence, 5% error, and 41% expected  
129 prevalence<sup>21</sup>. The sampling was proportional to the number of households in each hamlet, and a  
130 second serum sample was collected a year later from the same individuals included in the  
131 baseline study.

132

## 133 ***Leptospira* seropositivity**

134 The research team collected blood samples from participants at baseline (T0) and the followed-  
135 up study (T12). The serum samples were tested by microscopic agglutination test (MAT). To  
136 select the antigens for sample testing, a panel of 32 *Leptospira* strains, representing different  
137 species and serogroups, was evaluated (Table 1) using a random selection of 20% of the total

138 human serum samples collected at T0. After the evaluation, antigens with no agglutination  
139 results were eliminated from the panel, and a final list of 16 antigens was established to be tested  
140 with all sera for this study (Table 1). The MAT assay was performed according to Felzemburgh,  
141 *et al.*<sup>6</sup>. The evaluation and final screening assays were performed using dilutions of 1:50 and  
142 1:100 for human samples, and a positive sample was determined when 50% or more leptospire  
143 for a specific strain were agglutinated. Following the screening assay, positive samples were  
144 titrated to determine the higher titer for each strain.

145

### 146 **Outcome definitions**

147 In the primary analysis, the outcome of seroprevalent cases of *Leptospira* infection was defined  
148 as a positive MAT titer  $\geq 1:50$  with 50% or more leptospire agglutination at baseline (T0). Also,  
149 the outcome of seroincident cases of *Leptospira* infection was measured by MAT seroconversion  
150 from negative to positive or by a minimum four-fold increase in titers between follow-up  
151 samples (T12 vs. T0). The serogroup that represented the highest antibody titer was defined as  
152 the presumptive infecting serogroup. However, when two or more serogroups had the same titer,  
153 the sample was considered mixed serogroup seropositivity. Additionally, the seroprevalent and  
154 seroincident outcomes were categorized as seropositive to *Leptospira interrogans* serogroups  
155 and seropositive to other *Leptospira* species serogroups to perform a secondary analysis  
156 (multinomial analysis) (Table 1).

157

### 158 **Study exposures and covariates**

159 The main exposure was by working outdoors (farmers, ranchers, agricultural workers, day  
160 laborers, and water recollectors, among others). For the T0 study, this exposure was analyzed as  
161 a previous outdoor occupation (within the last five years) and a recent outdoor occupation (the  
162 previous year before the sample collection). For the prospective study, the outdoor occupation  
163 was evaluated based on the previous year before the sample collection.

164

165 Additionally, individual variables such as age (years), gender, ethnicity, time of residence in the  
166 study area, educational level, and previous episodes of fever (any past episode and during the last  
167 year of follow-up) were evaluated as potential confounders of the association between the main  
168 exposure and the outcomes.

169

170 Secondary exposures were access to public services (the presence of indoor plumbing, waste  
171 disposal, the presence of sewage, the presence of latrines, and the presence of pit latrines), the

172 presence of domestic animals in intra or peridomiciliary areas (the presence of canines, felines,  
173 poultry, turkeys, pigs, horses, donkeys, and mules), and the presence of synanthropic or wild  
174 animals in peridomiciliary areas (the presence of rodents and opossums). Additionally,  
175 covariates such as the type of roof and floor, wall materials, the characteristics of peridomiciliary  
176 areas (the presence of bushes, trees, grasses, corn cultivation, cassava cultivation, and tomato  
177 cultivation), household location (urban center and rural area) and household proximity (very  
178 near, near, scattered, and very scattered) were analyzed. Finally, common practices among  
179 family members such as forest fragmentation, deforestation, and the use of any rodent  
180 elimination measures were considered as covariates.

181

## 182 **Statistical analysis**

183 The seroprevalence and cumulative seroincidence were estimated considering the number of  
184 seropositive cases in the numerator and the number of people evaluated in both times (T0 and  
185 T12) as a denominator. Also, the confidence intervals were adjusted by random effects of the  
186 models (hamlets) for seroprevalence and seroincidence. In addition, the seroprevalent and  
187 seroincident cases were characterized using relative and absolute frequencies for qualitative  
188 variables and median and interquartile range for quantitative variables.

189

190 To estimate risk factors for seroprevalent and seroincident cases of *Leptospira* infection, a  
191 mixed-effects binary logistic regression model was used (seronegative vs seropositive samples).  
192 Additionally, a multinomial analysis was conducted using a mixed-effects multinomial logistic  
193 regression model for a specific evaluation of factors associated with the outcome of seropositive  
194 against *L. interrogans* serogroups and seropositive against other *Leptospira* species serogroups.  
195 Moreover, both models included three levels: individuals within households, households within  
196 hamlets, and hamlets (a random effect model using a variance component correlation matrix).  
197 The association between the main outcome (*Leptospira* seropositivity in humans) and variables  
198 at each level was evaluated (household and hamlet level). The linearity assumption was  
199 confirmed previous to the inclusion of quantitative variables in bivariate and multivariate  
200 models. Variables included in the multivariate models were those with  $p < 0.25$  in bivariate  
201 analysis. The multivariate analyses were performed using the stepwise method based on the  
202 researcher's criteria. The multilevel models of risk factors for *Leptospira* seropositivity in  
203 humans were weighted by the inverse probability of human selection in each hamlet.  
204 Confounders were evaluated in multivariate models, and the model that best explained the  
205 outcome was selected according to Bayesian Information Criteria (BIC). Odds ratios (OR) were

206 estimated in the cross-sectional study, and relative risks (RR) were estimated in the prospective  
207 study according to Localio, 2007<sup>22</sup>. All analyses were performed in SAS 9.04.01 using PROC  
208 GLIMMIX [17].

209

## 210 **Ethics statement**

211 The Committee of Ethics in Research of the University of Antioquia approved all procedures  
212 carried out in the present study, and participants were enrolled according to written informed  
213 consent procedures previously approved by the Committee of Ethics in Research.

214

## 215 **RESULTS**

216

### 217 ***Leptospira* seroprevalence and associated factors**

218

#### 219 *Binary outcome analysis*

220 For the baseline study (T0), 597 individuals (255 from Alto de Mulatos and 342 from Las  
221 Changas) that inhabited 246 households located in the rural areas (18% of oversampling) were  
222 enrolled. One hundred and three of them were in Alto de Mulatos and 143 in Las Changas. The  
223 sampling coverage of households and persons were 100% and 58.41% (597/1022), respectively.  
224 The overall *Leptospira* seroprevalence was 27.81% (166/597) (95% CI: 23.62–32.49), and the  
225 socio-ecological characteristics showed that 42.77% (71/166) of seropositive individuals had  
226 outdoor occupations, 52.41% (87/166) identified themselves as of male gender, and the mean age  
227 in years was 31.43 (IQR: 18.94–48.72). Additionally, among the seropositive individuals,  
228 62.65% (104/166) reported a history of fever, and 79.52% (132/166) reported inhabiting houses  
229 with dirt soil floors. Regarding the presence of domestic animals in intra or peridomiciliary  
230 areas, 55.42% (92/166) of seropositive individuals reported having seen opossums in the  
231 peridomiciliary, area and 26.51% (44/166) reported the presence of piglets in their household  
232 (Table S1).

233

234 Our analysis identified outdoor occupations (OR = 1.56; 95% CI:1.05–2.31), the presence of a  
235 dirt soil floor in the household (OR = 1.62; 95% CI:1.14–2.31), the presence of opossums in the  
236 peridomiciliary area (OR = 1.34; 95% CI:1.003–1.80), and the tenancy of piglets (OR = 1.45;  
237 95% CI:1.02–2.07) as risk factors to seropositivity against *Leptospira*. Also, the age as a  
238 categorized variable (OR > 15–29 years vs ≤ 1–15 years = 2.30; 95% CI:1.47–3.60 and OR > 46 years vs ≤ 1–15

239 years = 1.95; 95% CI:1.07–3.55), the male gender (OR = 2.01; 95% CI:1.42–2.84) and a history of  
240 fever (OR = 1.42; 95% CI:1.05–1.91) were factors associated with seropositivity (Table S1).

241

#### 242 *Multinomial outcome analysis*

243 According to our multinomial analysis, the seroprevalence of *L. interrogans* serogroups was  
244 18.25% (109/597) (95% CI: 14.34–23.11), and the seroprevalence of other *Leptospira*  
245 serogroups was 9.56% (57/597) (95% CI: 7.11–12.70). Among the participants seropositive to *L.*  
246 *interrogans*, the most frequent serogroup was Bataviae, followed by mixed serogroups and  
247 Djasiman. In addition, among the participants seropositive to other *Leptospira* species, the most  
248 frequent serogroup was Tarassovi, followed by Panama and Cynopteri (Figure 2).

249

250 Sociodemographic characteristics showed that 58.72% (64/109) of seropositive individuals  
251 against *L. interrogans* and 40.35% (23/57) seropositive for other *Leptospira* species were male.  
252 The median age of seropositive individuals was 33.23 years (IQR:19.67–49.25) and 28.42 years  
253 (IQR: 16.76–44.66) among *L. interrogans* and other *Leptospira* species, respectively. Of note, a  
254 higher proportion of the seropositive to *L. interrogans* serogroups had an outdoor occupation  
255 (52.29%, 57/109), while only 24.56% (14/57) of seropositive persons to other *Leptospira* species  
256 serogroups had similar occupations (Table S2).

257

258 Most of the participants that were seropositive to *L. interrogans* (81.65%, 89/109) and other  
259 *Leptospira* species (75.44%, 43/57) inhabited households with dirt soil floors. Approximately  
260 half of the seropositive individuals in both groups had indoor plumbing (49.54% for *L.*  
261 *interrogans* and 54.39% for other *Leptospira* species). Additionally, the presence of pit latrines  
262 in the households was 45.78% (52/109) for people with *L. interrogans* seropositivity and 47.37%  
263 (27/57) for other *Leptospira* species seropositivity (Table S2).

264

265 Regarding the presence of domestic, synanthropic, and wild animals, 60.55% (66/109) of people  
266 with seropositivity against *L. interrogans* and 45.61% (26/57) of people with seropositivity  
267 against other *Leptospira* species reported the presence of opossums in the peridomiciliary area.  
268 The presence of rats in intra and peridomiciliary areas was 84.40% (92/109) and 85.96% (49/57)  
269 in people seropositive against *L. interrogans* and other *Leptospira* species, respectively. In  
270 addition, 1.83% (2/109) of people seropositive to *L. interrogans* and 7.02% (4/57) of people  
271 seropositive to other *Leptospira* species had hunting canines (Table S2).

272



273 The multivariable multinomial analysis showed that occupations such as ranchers, daily laborers,  
274 farmers, and agricultural (and similar) workers were a risk factor for the outcome of *L.*  
275 *interrogans* serogroups seropositivity (OR = 2.06; 95% CI:1.31–3.26). In addition, the male  
276 gender (OR = 2.34; 95% CI:1.55–3.53) and older age (OR  $> 15-29$  years vs  $\leq 1-15$  years = 2.52; 95%  
277 CI:1.44–4.41 and OR  $> 46$  years vs  $\leq 1-15$  years = 1.95; 95% CI:1.07–3.55), the presence of dirt soil in  
278 the household (OR = 1.87; 95% CI:1.21–2.89), and the presence of piglets (OR = 1.66; 95%  
279 CI:1.11–2.49) and opossums (OR = 1.58; 95% CI:1.11–2.23) in the peridomiciliary area were  
280 factors associated with *L. interrogans* serogroups seropositivity. Besides, the multivariable  
281 model for the outcome of seropositivity to other *Leptospira* species serogroups adjusted by  
282 occupation, gender, and age showed that the presence of pit latrines (OR = 2.34; 95% CI:1.27–  
283 4.32) and turkeys as companionship (OR = 4.99; 95% CI:2.03–12.30) were risk factors (Table  
284 2).

285

## 286 ***Leptospira* seroincidence and associated factors**

287

### 288 *Binary outcome analysis*

289 In the follow-up study, 274 participants were enrolled at 12 months (T12), and 120 and 154  
290 people were followed up in Alto de Mulatos and Las Changas, respectively. In Table S3, the  
291 characteristics of the people included in the study and lost to the follow-up in both areas are  
292 shown. The overall cumulative seroincidence of *Leptospira* was 14.60% (40/274) (95% CI:  
293 10.33–20.23), 35.00% (14/40) of the seroincident cases had an outdoor occupation, and 27.50%  
294 (11/40) were identified as male. In addition, the median age in years of seroincident cases was  
295 40.30 (IQR: 20.46–55.34), and 80.00% (32/40) were inhabitants of a household with a dirt soil  
296 floor. Furthermore, among the seroincident cases, 5.00% (2/40), 2.99% (3/40), and 85.00%  
297 (34/49) of the seroincident cases disclosed the presence of corn cultivation around the household  
298 and hunting canines and rats in the intra or peridomiciliary areas, respectively (Table S4).

299 According to risk factors associated with seroincident cases of *Leptospira* infection, an outdoor  
300 occupation in the last year (RR = 2.66; 95% CI:1.46–4.68), a dirt soil floor in the household (RR  
301 = 1.77; 95% CI:1.01–3.06), the presence of corn cultivation in the peridomiciliary area (RR =  
302 8.33.74; 95% CI:2.21–19.65), the presence of hunting canines (RR = 5.16; 95% CI:1.83–10.74),  
303 and rat infestation (RR = 2.00; 95% CI:1.03–3.76) in the intra or peridomiciliary area were  
304 identified (Table S4).

305

### 306 *Multinomial outcome analysis*

307 The multinomial analysis regarding serogroups showed that the seroincidence for *L. interrogans*  
308 serogroups and other *Leptospira* species serogroups was 8.39% (23/274) (95% CI: 5.25-13.15)  
309 and 6.20% (17/274) (95% CI: 3.38–10.93), respectively. Seroincident cases of *L. interrogans* and  
310 other *Leptospira* serogroups were male in 30.43% (7/23) and 23.53% (4/17) of cases,  
311 respectively. Also, 39.13% (9/23) of seroincident cases of *L. interrogans* serogroups and 29.41%  
312 (5/17) of seroincident cases of other *Leptospira* serogroups had had outdoor occupations in the  
313 previous year. The median age for the seroincident cases was 47.46 years (IQR: 24.76-58.42)  
314 and 29.99 years (18.19–49.28) for *L. interrogans* serogroups and other *Leptospira* species  
315 serogroups, respectively. Only one person in the group of *L. interrogans* reported a history of  
316 fever in the year of follow-up (Table S5).

317  
318 In addition, for the characteristics of the peridomestic area, 8.70% (2/23) of seroincident cases  
319 by *L. interrogans* serogroups reported corn cultivations around their houses. Cassava cultivations  
320 were also reported in the peridomestic area of seroincident cases for *L. interrogans* (13.04%,  
321 3/23) and other *Leptospira* serogroups (17.65%, 3/17). Additionally, households of seroincident  
322 cases for both outcomes had a high frequency of rat infestation with 91.30 % (21/23) for *L.*  
323 *interrogans* and 76.47% (13/17) for other *Leptospira* species. Only the seroincident cases for  
324 other *Leptospira* species serogroups reported hunting canines (17.65%, 3/17) (Table S5).

325  
326 The multivariable model evidenced outdoor occupations in the last year (RR = 2.93; 95%  
327 CI:1.36-6.16), the presence of rats (RR = 2.81; 95% CI:1.07-7.12), and corn cultivation around  
328 the households (RR = 22.74; 95% CI:5.75–51.74) as risk factors for the seroincident cases of *L.*  
329 *interrogans* serogroups. Besides, the age in years (as a quantitative variable) was a risk marker  
330 (RR = 1.02; 95% CI:1.01–1.04), and male gender was a protector marker (RR = 0.34; 95%  
331 CI:0.15–0.80) for the seroincident cases of *L. interrogans* serogroups (Table 3). Likewise, the  
332 multivariable model for seroincident cases of other *Leptospira* species adjusted by occupation,  
333 age, and gender, showed that the presence of hunting canines (RR = 6.17; 95% CI:2.72–10.99)  
334 and cassava cultivation (RR = 3.05; 95% CI:1.24–6.52) were risk factors (Table 3).

335  
336 Among *L. interrogans* seroincident cases, the most frequent serogroup seropositivity was against  
337 Bataviae, followed by Djasiman and mix serogroups (Figure 3). Of note, 100% of seroincident  
338 cases of Djasiman, Icterohaemorrhagiae, and Autumnalis serogroups were exposed to rodents in  
339 their households, and 88.88% of seroincident cases to Bataviae serogroup had the same exposure  
340 to rodents. Among seroincident cases to other *Leptospira* species serogroup, the most frequent

341 seropositivity was against Tarassovi, followed by Panama (Figure 3). Furthermore, 50% (3/6)  
342 and 60% (3/5) of seroincident cases to Tarassovi and Panama serogroups had pigs and opossums  
343 around their households, respectively.

344

## 345 **DISCUSSION**

346

347 Leptospirosis is a zoonotic disease with mandatory notification to the National Surveillance  
348 System in Public Health in Colombia since 2007. However, the program fails to detect active  
349 cases of leptospirosis in rural areas due to the low access to diagnostic tests and the lack of  
350 medical presumption<sup>20</sup>. Thus, conducting prospective studies to analyze and detect potential  
351 areas at risk of transmission of tropical diseases, as well as estimating risk and protective factors  
352 for subsequent interventions, are becoming increasingly necessary. The Urabá region in the  
353 Department of Antioquia, Colombia, is considered a potential endemic region for tropical  
354 diseases such as malaria, leishmaniasis, dengue viruses, leptospirosis, and rickettsiosis, among  
355 others<sup>15,23,24</sup>. Therefore, analyzing seropositivity outcomes for more than one disease when  
356 conducting analytical observational studies could broaden the understanding of factors for those  
357 tropical and neglected diseases potentially endemic in this region.

358

359 The overall *Leptospira* seroprevalence estimated in the current study was 27.81%, very similar to  
360 the report from San Juan, Puerto Rico (27.2%, 55/202)<sup>25</sup>. Additional studies conducted in the  
361 Urabá region using a definition of seropositive outcome  $\geq 1:100$  titers by MAT, reported a  
362 *Leptospira* seroprevalence of 35.6%<sup>14</sup> and 12.5%<sup>13</sup>. We also estimated an overall cumulative  
363 seroincidence of *Leptospira* of 14.60%; to the best of our knowledge, this could be the first  
364 estimation of *Leptospira* seroincidence in Colombia, which helps to identify potential areas at  
365 risk of leptospires transmission.

366

367 The factors associated with both seroprevalent and seroincident cases of *Leptospira* infection,  
368 after controlling for potentially confounding variables and adjusting for our design effect, were  
369 history of outdoor occupation such as farming, agriculture, or daily laboring, and older age. For  
370 the seroprevalence analysis, male gender was also a factor associated with *Leptospira* infection.  
371 These exposures (outdoor labor) are recognized as an occupational risk for *Leptospira* infection  
372<sup>3,26</sup>. These results are confirmed by our demographic data, showing that male individuals over 15  
373 years old have a high probability of working outdoors in the Urabá region. Furthermore, the risk

374 markers identified in our study, such as gender and age, were also reported as factors associated  
375 with *Leptospira* infection in previous studies <sup>6,27</sup>.

376  
377 Other characteristics found in our study area, such as poverty and some cultural practices (e.g.,  
378 an abundance of domestic animals and precariousness in household construction) are conditions  
379 highly associated with the presence of a large number of tropical zoonotic diseases <sup>28</sup>. Our  
380 analysis showed that the tenancy of piglets and the eyesight of opossums in the peridomiciliary  
381 area were important risk factors for seroprevalent cases, and the presence of a dirt floor inside  
382 households was associated with both seroprevalent and seroincident cases of *Leptospira*  
383 infection. Other studies have identified the presence of piglets and opossums in the  
384 peridomiciliary area as risk factors for *Leptospira* infection; these mammals have been  
385 considered as potential hosts participating in the life cycles of several *Leptospira* species <sup>3,29,30</sup>.  
386 Also, Bierke *et al.* <sup>31</sup> found that *Leptospira* can survive for long periods in several types of soil  
387 depending on its physical, chemical, and biological conditions such as pH, temperature, or  
388 mineral concentration. Furthermore, a significant amount of *Leptospira* has been detected in 31%  
389 (22/70) of samples from different soil microenvironments in a neighborhood endemic  
390 leptospirosis in Salvador, Bahia, Brazil <sup>32</sup>.

391  
392 *Leptospira* infection in the Department of Antioquia is most commonly caused by serogroups of  
393 the *L. interrogans* species <sup>9</sup>. A study conducted in the Urabá region on patients with leptospirosis  
394 showed a high proportion of infection for *L. interrogans* serogroups of Copenhageni  
395 (28.6%), Hardjo (20.6%), Australis (17.5%), Canicola (11.1%), and Pomona (6.3%). Other  
396 *Leptospira* serogroups were also found to have a high infection proportion, including Tarassovi  
397 (25.4%), Grippotyphosa (17.5%), Shermani (9.5%), Ballum (7.9%), Cynopteri (3.2%), and  
398 Panama (1.6%) <sup>28</sup>. Moreover, in the same study, of 199 patients with febrile syndrome, 11.56%  
399 were infected by *L. interrogans* serogroup Icterohaemorrhagiae, 10.05% were infected by  
400 Sejroe, and other serogroups registered a proportion of infection near to 10% <sup>20</sup>. Regarding  
401 seroprevalent cases in the Urabá region, it was reported that 87% of seroprevalent cases had high  
402 titers against Icterohaemorrhagiae, followed by the Sejroe serogroup [14]. Likewise, in a study  
403 conducted in the city of Cali in the south of Colombia, the seroprevalence of *Leptospira* was  
404 12.53%, and the most frequent serogroup in seroprevalent cases was Australis (61.4% of  
405 prevalent cases) [33].

406

407

408 Although multinomial regression modeling is infrequently used to analyze infectious diseases <sup>33</sup>,  
409 this method had the advantage of estimating the simultaneous effects of multiple factors. In our  
410 study, we analyzed the factors associated with the risk of *Leptospira* infection, stratified in two  
411 categories (*L. interrogans* serogroups and other species serogroups), and, according to our  
412 knowledge, this is the first publication that reports its use in the study of *Leptospira* infection. In  
413 this sense, outdoor occupations, age in years, male gender, the presence of dirt soil floors, and  
414 the presence of piglets and opossums in peridomiciliary areas were factors associated with  
415 seroprevalent cases of *L. interrogans* serogroups. Additionally, the presence of pit latrines  
416 around households and turkeys as companionship were risk factors for seropositivity against  
417 other *Leptospira* species serogroups. Similarly, a lack of toilets inside the households was a  
418 factor associated with *Leptospira* seropositivity (OR unadjusted = 3.75; 95 CI%: 1.33–10.60) in  
419 a study carried out in the south of Colombia <sup>34</sup>. Recently, a study in Germany identified the  
420 presence of poultry in peridomiciliary areas as a risk factor for *Leptospira* infection <sup>26</sup>. However,  
421 it is most likely that the presence of poultry or turkeys in peridomiciliary areas is associated with  
422 the presence of synanthropic rodents or wild mammals, a necessary condition to maintain  
423 leptospires in the environment <sup>35</sup>.

424  
425 Regarding seroincidence cases, the multinomial analysis identified the presence of rodents in  
426 intra or peridomiciliary areas, outdoor occupations, the presence of corn cultivation in  
427 peridomiciliary areas (proxy of the presence of synanthropic and wild mammals), and age in  
428 years as factors associated with seroincident cases of *L. interrogans* serogroups. In this  
429 multinomial analysis, we also found that the presence of hunting canines and cassava cultivation  
430 in peridomiciliary areas were risk factors for seroincident cases for other *Leptospira* species  
431 serogroups. Similar to urban areas of Brazil, where only *L. interrogans* serogroup is circulating,  
432 household conditions (household income), sociodemographic aspects (age, gender, and  
433 occupation), and rat infestation were risk factors for *Leptospira* infection <sup>5,6,27</sup>. Regarding the  
434 canines, these domestic animals have been considered important reservoirs or hosts in the  
435 infection cycle of *Leptospira* because they can expel the leptospires through their urine for long  
436 periods of time (weeks or months) <sup>36</sup>. Different serogroups of *Leptospira* such as Canicola,  
437 Autumnalis, Australis, Grippotyphosa, Harjo, Pomona, Pyrogenes, and Djasiman, among others  
438 <sup>37–40</sup>, have been found in canines. In Brazil, a longitudinal study of dogs found a seroprevalence  
439 between 9.3% (95% CI:6.7–12.6) and 19% (95% CI:14.1–25.2) in different periods.  
440 Additionally, an overall cumulative seroincidence of 11% (95%CI:9.1–13.2) was estimated, and

441 the cumulative seroincidence by trimester varied between 6% (95% CI:3.3–10.6) and 15.3%  
442 (95% CI:10.8–21.2)<sup>40</sup>.

443

444 In this study, reactivity to Bataviae was the most frequent among prevalent and incident cases of  
445 *L. interrogans* seropositive individuals, indicating that these cases had probably been exposed to  
446 infected rodents or canines<sup>41,42</sup>. Nevertheless, detection of antibodies against Djasiman and  
447 Icterohaemorrhagiae serogroups evidenced additional exposure to sources contaminated with  
448 leptospires shed by synanthropic or wild mammals<sup>3,29</sup>. Regarding different species of *L.*  
449 *interrogans* serogroups, this study showed a high frequency of seroprevalent and seroincident  
450 cases against the Tarassovi serogroup, which is mainly found in pigs<sup>3,30</sup>. Even though the  
451 Tarassovi serogroup is present in different species of *Leptospira* considered as pathogens and  
452 classified into subgroup II, this serogroup has not been incriminated in clinical cases of  
453 leptospirosis in humans yet<sup>43</sup>. The Panama serogroup was another important serogroup found in  
454 seroprevalent and seroincident cases. This serogroup was initially described in opossums, wild  
455 rodents, and numerous domestic animals. However, there are several clinical cases of  
456 leptospirosis described in humans, potentially caused by the Panama serogroup<sup>44,45</sup>. Finally,  
457 reactivity to the Cynopteri serogroup was the third in seroprevalent cases and the fourth in  
458 seroincident cases. This serogroup is frequent in bats and various wild animals<sup>3,46,47</sup>.

459

460 The main limitation of this study was the moderate sampling coverage of individuals (58.41%).  
461 Some participants declined the study enrollment, and others moved out in search of a job.  
462 Consequently, selection bias was likely present in this study at the analysis unit (inhabitants of  
463 households). Another important limitation was the information bias as a result of obtaining group  
464 information of participants enrolled in each household through the family head, such as cultural  
465 practices shared by all household inhabitants. However, this study considered that some habits  
466 and perceptions are widespread in households depending on the region or area where people  
467 have grown or lived; for instance, the risk perceptions related to infectious diseases, self-care  
468 measures, or land use. For the seroincidence analysis, the main limitation was the losses to  
469 follow-up. Selection bias was likely introduced in the estimation of the overall cumulative  
470 seroincidence, serogroups seroincidence, and associated factors because the majority of the  
471 losses were males. Another potential limitation was the sensitivity and specificity of the  
472 microagglutination test to detect the seroincident and seroprevalent cases, especially in  
473 seropositive individuals who had titers equal to 1:50. Nevertheless, the sensitivity and specificity  
474 of the test could be increased when diverse serovars are included, especially those circulating in

475 the same area. In this study, 32 *Leptospira* strains representing several species and serogroups  
476 (Table 1) were included, and a random selection of 20% of the total human serum samples  
477 collected at T0 was used to select the final panel of 16 *Leptospira* strains tested in this study. In  
478 addition, the classification of most probable infecting serogroup (*L. interrogans* and other  
479 *Leptospira* species serogroups) by MAT is not perfect and it could result in misclassification  
480 bias. Finally, information biases are also a concern in the followed-up participants, specifically,  
481 memory biases respecting changing exposures such as episodes of fever, sporadic outdoor  
482 occupations, and contact with synanthropic, wild, or domestic mammals, among other variables.

483

## 484 CONCLUSIONS

485

486 The current study aimed to understand the potential public health problem of *Leptospira*  
487 transmission in the rural areas of Urabá, Colombia, where fatal cases of leptospirosis have  
488 occurred. The estimated *Leptospira* seroprevalence was 27.81%, with infections being  
489 predominantly caused by serogroups of *L. interrogans* (65.66%). The overall seroincidence of  
490 *Leptospira* was 14.60%, and a contrast between seroprevalence results with a very similar  
491 distribution between *L. interrogans* and other *Leptospira* species serogroups was evident. Also,  
492 we identified important risk factors for *Leptospira* infection, which indicates that although  
493 different activities and characteristics are related to different species of *Leptospira*, there is a  
494 major risk of infection caused by different species circulating in the area. The sequential binary  
495 and multinomial regression analysis of this study allowed us to obtain the estimated risk and  
496 protective factors associated with *Leptospira* infection (seroprevalent and seroincident cases) in  
497 rural areas of the Urabá region. The characteristics of the cases of *Leptospira* infection identified  
498 in this study agreed with the cases reported in the Colombian surveillance system for *Leptospira*  
499 <sup>48</sup>. Also, this rural area seems to have different species of *Leptospira* circulating, from other areas  
500 such as Salvador Bahia, Brazil, which is more urban area and where the rat has a major role in  
501 transmission. But this study is consistent with other works showing that transmission in rural  
502 areas is also dependent on wild animals and environmental conditions favoring the risk of  
503 infection, making disease control difficult and highlights the importance of this study, which  
504 identify factors associated to *Leptospira* infection. The longterm goal of this work is to  
505 strengthen the surveillance system by identifying areas at risk for *Leptospira* transmission. This,  
506 in turn, will aid targeted efforts to provide appropriate diagnosis and timely treatment and  
507 ultimately reduce the case fatality rate associated with the disease. Finally, this study will help to  
508 prioritize and develop strategies to prevent incident cases in this area and will help to strengthen

509 educational strategies to prevent the transmission of the disease in the communities from rural  
510 areas of Colombia.

511

## 512 **ACKNOWLEDGEMENTS**

513

514 We are thankful to the research groups Salud y Ambiente and Epidemiología of Facultad  
515 Nacional de Salud Pública from Universidad de Antioquia and the Laboratory of Epidemiology  
516 of Microbial Diseases from Yale School of Public Health for their logistic support to conduct  
517 this study. We also recognize the help from the communities of Alto de Mulatos and Las  
518 Changas from the Urabá region. We express our gratitude to the Fogarty International Center for  
519 the help and advice obtained through the Research Training Program on the Impact of Zoonotic  
520 and Vector-borne Viruses, Rickettsiae, and Leptospira in Acute Undifferentiated Febrile  
521 Illnesses (5D43TW010331-05), NIH through the Naturally Acquired and Vaccine-Mediated  
522 Immunity to Leptospirosis grant (R01AI121207), and Departamento Administrativo de Ciencia,  
523 Tecnología e Innovación (Colciencias) (award: 111565741009). The funders had no role in the  
524 study design, data collection and analysis, decision to publish, or preparation of the manuscript.

525

## 526 **CONFLICT OF INTEREST**

527

528 None.

529

## 530 **References**

531

- 532 1. Ko AI, Goarant C, Picardeau M. Leptospira: The dawn of the molecular genetics era for  
533 an emerging zoonotic pathogen. *Nat Rev Microbiol.* 2009;7(10):736-747.  
534 doi:10.1038/nrmicro2208
- 535 2. Thibeaux R, Girault D, Bierque E, et al. Biodiversity of environmental Leptospira:  
536 Improving identification and revisiting the diagnosis. *Front Microbiol.* 2018;9(MAY):1-  
537 14. doi:10.3389/fmicb.2018.00816
- 538 3. Bharti AR, Nally JE, Ricaldi JN, et al. Leptospirosis: a zoonotic disease of global  
539 importance. *Lancet Infect Dis.* 2003;3(December):757-771.
- 540 4. Costa F, Hagan JE, Calcagno J, et al. Global Morbidity and Mortality of Leptospirosis : A  
541 Systematic Review. *PLoS Negl Trop Dis.* 2015;17(9):e0003898.  
542 doi:10.1371/journal.pntd.0003898



- 543 5. Hagan JE, Moraga P, Costa F, et al. Spatiotemporal Determinants of Urban Leptospirosis  
544 Transmission: Four-Year Prospective Cohort Study of Slum Residents in Brazil. *PLoS*  
545 *Negl Trop Dis*. 2016;10(1):1-16. doi:10.1371/journal.pntd.0004275
- 546 6. Felzemburgh RDM, Ribeiro GS, Costa F, et al. Prospective Study of Leptospirosis  
547 Transmission in an Urban Slum Community: Role of Poor Environment in Repeated  
548 Exposures to the *Leptospira* Agent. *PLoS Negl Trop Dis*. 2014;8(5).  
549 doi:10.1371/journal.pntd.0002927
- 550 7. Plowright RK, Parrish CR, McCallum H, et al. Pathways to zoonotic spillover. *Nat Rev*  
551 *Microbiol*. 2017;15(8):502-510. doi:10.1038/nrmicro.2017.45
- 552 8. Hacker KP, Sacramento GA, Cruz JS, et al. Influence of rainfall on leptospira infection  
553 and disease in a tropical urban setting, Brazil. *Emerg Infect Dis*. 2020;26(2):311-314.  
554 doi:10.3201/eid2602.190102
- 555 9. Bello S, Rodríguez M, Paredes A, et al. Comportamiento de la vigilancia epidemiológica  
556 de la leptospirosis humana en Colo. *Biomedica*. 2013;33.
- 557 10. Instituto Nacional de Salud. Informe final del evento leptospirosis. Published online  
558 2018:1-3.
- 559 11. Instituto Nacional de Salud. Informe final del evento leptospirosis. Published online  
560 2016:1-19.
- 561 12. Instituto Nacional de Salud. Informe final del evento leptospirosis. Published online  
562 2017:1-3.
- 563 13. Piedad A-F, Jaramillo R-BN, Arboleda N-M. Situación de la leptospirosis en el Urabá  
564 antioqueño colombiano: estudio seroepidemiológico y factores de riesgo en población  
565 general urbana. *Cad Saude Publica*. 2007;23(9):2094-2102. doi:10.1590/S0102-  
566 311X2007000900017
- 567 14. Padmanabha H, Hidalgo M, Valbuena G, et al. Geographic variation in risk factors for  
568 SFG rickettsial and leptospiral exposure in Colombia. *Vector-Borne Zoonotic Dis*.  
569 2009;9(5):483-490. doi:10.1089/vbz.2008.0092
- 570 15. Arroyave E, Londoño AFAF, Quintero JCC, et al. Etiología y caracterización  
571 epidemiológica del síndrome febril no palúdico en tres municipios del Urabá antioqueño,  
572 Colombia. *Biomedica*. 2013;33(1):99-107.  
573 doi:http://dx.doi.org/10.7705/biomedica.v33i0.734
- 574 16. Pérez-García J, Arboleda M, Agudelo-Flórez P. Leptospirosis infantil en pacientes con  
575 síndrome febril en la región de Urabá, Colombia. *Rev Peru Med Exp Salud Publica*.  
576 2017;33(4):775. doi:10.17843/rpmesp.2016.334.2561

- 577 17. Agudelo-Flórez P, Londoño AF, Quiroz VH, et al. Prevalence of *Leptospira* spp . in  
578 Urban Rodents from a Groceries Trade Center of Medellín , Colombia. *Am J Trop Med*  
579 *Hyg.* 2009;81(5):906-910. doi:10.4269/ajtmh.2009.09-0195
- 580 18. Romero MH., Sánchez JA., Hayek LC. The prevalence of antibodies against *Leptospira* in  
581 urban human and canine populations from the Tolima department [Prevalencia de  
582 anticuerpos contra *Leptospira* en población urbana humana y canina del Departamento del  
583 Tolima]. *Rev Salud Publica.* 2010;12(2):268-275.
- 584 19. Trimble A, Blevins CA, Beard LA, Deforno AR, Davis EG. Seroprevalence , frequency of  
585 leptospiuria , and associated risk factors in horses in Kansas , Missouri , and Nebraska  
586 from 2016- 2017. *PLoS One.* 2018;13(10):1-12.
- 587 20. Pérez-García J, Agudelo-Flórez P, Parra-Henao G, Ochoa J, Arboleda M. Incidencia y  
588 subregistro de leptospirosis comparando tres métodos diagnósticos, en una región  
589 endémica, Urabá, Colombia. *Biomedica.* 2019;39(1):7-11.
- 590 21. Quintero JC, Paternina LE, Uribe Y A, et al. Eco-epidemiological analysis of rickettsial  
591 seropositivity in rural areas of Colombia: A multilevel approach. *PLoS Negl Trop Dis.*  
592 2017;18:1-19.
- 593 22. Localio AR, Margolis DJ, Berlin JA. Relative risks and confidence intervals were easily  
594 computed indirectly from multivariable logistic regression. *J Clin Epidemiol.*  
595 2007;60(9):874-882. doi:10.1016/j.jclinepi.2006.12.001
- 596 23. Quintero Vélez JC, Faccini-Martínez ÁA, Rodas González JD, et al. Fatal *Rickettsia*  
597 *rickettsii* infection in a child, Northwestern Colombia, 2017. *Ticks Tick Borne Dis.*  
598 2019;10(Aug):995-996. doi:10.1016/j.ttbdis.2019.05.009
- 599 24. Restrepo B, Rodas JD, Montoya-Ruiz C, Zuluaga AM, Parra-Henao G, Agudelo-Flórez P.  
600 Evidencia serológica retrospectiva de infecciones por *Leptospira* spp., dengue, hantavirus  
601 y arenavirus en indígenas Emberá-Katío, Colombia. *Rev Chil infectología.*  
602 2016;33(4):472-473. doi:10.4067/s0716-10182016000400015
- 603 25. Briskin EA, Casanovas-Massana A, Ryff KR, et al. Seroprevalence, Risk Factors, and  
604 Rodent Reservoirs of Leptospirosis in an Urban Community of Puerto Rico, 2015. *J Infect*  
605 *Dis.* 2019;220(9):1489-1497. doi:10.1093/infdis/jiz339
- 606 26. Brockmann SO, Ulrich L, Piechotowski I, et al. Risk factors for human *Leptospira*  
607 seropositivity in South Germany. *Springerplus.* 2016;5(1). doi:10.1186/s40064-016-3483-  
608 8
- 609 27. Maciel EAP, de Carvalho ALF, Nascimento SF, et al. Household transmission of  
610 *Leptospira* infection in urban slum communities. *PLoS Negl Trop Dis.* 2008;2(1).

- 611 doi:10.1371/journal.pntd.0000154
- 612 28. Yusti D, Arboleda M, Agudelo-Flórez P. Factores de riesgo sociales y ambientales  
613 relacionados con casos de leptospirosis de manejo ambulatorio y hospitalario, Turbo,  
614 Colombia. *Biomedica*. 2013;33(SUPPL.1):117-129. doi:10.7705/biomedica.v33i0.1457
- 615 29. Fornazari F, Langoni H, Marson PM, Nóbrega DB, Teixeira CR. Leptospira reservoirs  
616 among wildlife in Brazil: Beyond rodents. *Acta Trop*. 2018;178:205-212.  
617 doi:10.1016/j.actatropica.2017.11.019
- 618 30. Cruz-Romero A, Alvarado-Esquivel C, Romero-Salas D, et al. Seroepidemiology of  
619 Leptospira infection in backyard pigs in Durango State, Mexico. *Eur J Microbiol*  
620 *Immunol*. 2018;8(July):1-4. doi:10.1556/1886.2018.00009
- 621 31. Bierque E, Thibeaux R, Girault D, Soupé-Gilbert ME, Goarant C. A systematic review of  
622 Leptospira in water and soil environments. *PLoS One*. 2020;15(1):1-22.  
623 doi:10.1371/journal.pone.0227055
- 624 32. Schneider AG, Casanovas-Massana A, Hacker KP, et al. Quantification of pathogenic  
625 Leptospira in the soils of a Brazilian urban slum. *PLoS Negl Trop Dis*. 2018;12(4):1-15.  
626 doi:10.1371/journal.pntd.0006415
- 627 33. Varga C, Middleton D, Walton R, et al. Evaluating risk factors for endemic human  
628 Salmonella Enteritidis infections with different phage types in Ontario, Canada using  
629 multinomial logistic regression and a case-case study approach. *BMC Public Health*.  
630 2012;12(1):1. doi:10.1186/1471-2458-12-866
- 631 34. Escandón-Vargas K, Osorio L, Astudillo-Hernández M. Seroprevalence and factors  
632 associated with Leptospira infection in an urban district of Cali, Colombia. *Cad Saude*  
633 *Publica*. 2017;33(5):e00039216. doi:10.1590/0102-311X00039216
- 634 35. Barragan V, Nieto N, Keim P, Pearson T. Meta-analysis to estimate the load of Leptospira  
635 excreted in urine: Beyond rats as important sources of transmission in low-income rural  
636 communities. *BMC Res Notes*. 2017;10(1):1-7. doi:10.1186/s13104-017-2384-4
- 637 36. Rojas P, Monahan AM, Schuller S, Miller IS, Markey BK, Nally JE. Detection and  
638 quantification of leptospires in urine of dogs: A maintenance host for the zoonotic disease  
639 leptospirosis. *Eur J Clin Microbiol Infect Dis*. 2010;29(10):1305-1309.  
640 doi:10.1007/s10096-010-0991-2
- 641 37. Stokes JE, Kaneene JB, Schall WD, et al. Prevalence of serum antibodies against six  
642 Leptospira serovars in healthy dogs. *J Am Vet Med Assoc*. 2007;230(11):1657-1664.  
643 doi:10.2460/javma.230.11.1657
- 644 38. Miller RI, Ross SP, Sullivan ND, Perkins NR. Clinical and epidemiological features of

- 645 canine leptospirosis in North Queensland. *Aust Vet J.* 2007;85(1-2):13-19.  
646 doi:10.1111/j.1751-0813.2006.00089.x
- 647 39. Alton GD, Berke O, Reid-Smith R, Ojkic D, Prescott JF. Increase in seroprevalence of  
648 canine leptospirosis and its risk factors, Ontario 1998-2006. *Can J Vet Res.*  
649 2009;73(3):167-175.
- 650 40. Morikawa VM, Bier D, Pellizzaro M, et al. Seroprevalence and seroincidence of  
651 *Leptospira* infection in dogs during a one-year period in an endemic urban area in  
652 Southern Brazil. *Rev Soc Bras Med Trop.* 2015;48(1):50-55. doi:10.1590/0037-8682-  
653 0213-2014
- 654 41. Benacer D, Mohd Zain SN, Sim SZ, et al. Determination of *Leptospira borgpetersenii*  
655 serovar Javanica and *Leptospira interrogans* serovar Bataviae as the persistent *Leptospira*  
656 serovars circulating in the urban rat populations in Peninsular Malaysia. *Parasites and*  
657 *Vectors.* 2016;9(1):1-11. doi:10.1186/s13071-016-1400-1
- 658 42. Boonciew P, Kurilung A, Altheimer K, Hartmann K, Prapasarakul N. Draft Genome  
659 Sequence of *Leptospira interrogans* Serovar Bataviae Strain D64, Isolated from the Urine  
660 of an Asymptomatic Dog in Pathum Thani, Thailand. *Microbiol Resour Announc.*  
661 2020;9(30):e00361. doi:10.1128/MRA.00361-20
- 662 43. Picardeau M. Virulence of the zoonotic agent of leptospirosis: Still terra incognita? *Nat*  
663 *Rev Microbiol.* 2017;15(5):297-307. doi:10.1038/nrmicro.2017.5
- 664 44. Vado-Solís I, Cárdenas-Marrufo MF, Jiménez-Delgado B, et al. Clinical-  
665 epidemiological study of leptospirosis in humans and reservoirs in Yucatán, México. *Rev*  
666 *Inst Med Trop Sao Paulo.* 2002;44(6):335-340. doi:10.1590/S0036-46652002000600008
- 667 45. Martins G, Loureiro AP, Hamond C, et al. First isolation of *Leptospira noguchii*  
668 serogroups Panama and Autumnalis from cattle. *Epidemiol Infect.* 2015;143(7):1538-  
669 1541. doi:10.1017/S0950268814002416
- 670 46. Lins ZC, Lopes ML. Isolation of *Leptospira* from wild forest animals in Amazonian  
671 Brazil. *Trans R Soc Trop Med Hyg.* 1984;78(1):124-126. doi:10.1016/0035-  
672 9203(84)90191-3
- 673 47. Langoni H, Kuribara IY, Ferreira Lopes Correa AP, Ullmann LS, Sánchez GP, Lucheis  
674 SB. Anti-leptospirosis agglutinins in Brazilian capybaras (*hydrochoerus hydrochaeris*). *J*  
675 *Venom Anim Toxins Incl Trop Dis.* 2016;22(1):13-16. doi:10.1186/s40409-016-0059-6
- 676 48. Instituto Nacional de Salud (INS). *Boletín Epidemiológico Semana: Leptospirosis.*; 2020.
- 677 49. Costa F, Ribeiro GS, Felzemburgh RDM, et al. Influence of Household Rat Infestation on  
678 *Leptospira* Transmission in the Urban Slum Environment. *PLoS Negl Trop Dis.*

679 2014;8(12). doi:10.1371/journal.pntd.0003338

680

681

682 Figure 1. Map of the study area localized in rural areas of Urabá region of Antioquia, Colombia.

683

684 Figure 2. Frequency of *L. interrogans* and other *Leptospira* serogroups in the seroprevalent  
685 cases.

686

687 Figure 3. Frequency of *L. interrogans* and other *Leptospira* serogroups in the seroincident cases.

688

**Table 1.** Panel of *Leptospira* strains used in this study for the microagglutination test (MAT)

| Species                  | Serogroup                  | Serovar*              | Strain                |
|--------------------------|----------------------------|-----------------------|-----------------------|
| <i>L. interrogans</i>    | <b>Djasiman</b>            | <b>Djasiman*</b>      | <b>Djasiman</b>       |
| <i>L. interrogans</i>    | Icterohaemorrhagiae        | Icterohaemorrhagiae   | RGA                   |
| <i>L. interrogans</i>    | Icterohaemorrhagiae        | Copenhageni           | M 20                  |
| <i>L. interrogans</i>    | <b>Icterohaemorrhagiae</b> | <b>Copenhageni*</b>   | <b>L1 130</b>         |
| <i>L. interrogans</i>    | Sejroe                     | Hardjo                | Hardjoprajitno        |
| <i>L. interrogans</i>    | Sejroe                     | Wolffi                | 3705                  |
| <i>L. interrogans</i>    | <b>Bataviae</b>            | <b>Bataviae*</b>      | <b>Van Tienen</b>     |
| <i>L. interrogans</i>    | <b>Pyrogenes</b>           | <b>Pyrogenes*</b>     | <b>Salinem</b>        |
| <i>L. interrogans</i>    | <b>Pyrogenes</b>           | <b>Manilae*</b>       | <b>L495</b>           |
| <i>L. interrogans</i>    | <b>Pomona</b>              | <b>Pomona*</b>        | <b>Pomona</b>         |
| <i>L. interrogans</i>    | <b>Autumnalis</b>          | <b>Autumnalis*</b>    | <b>Akiyami A</b>      |
| <i>L. interrogans</i>    | <b>Canicola</b>            | <b>Canicola*</b>      | <b>H. Utrecht IV</b>  |
| <i>L. interrogans</i>    | Hebdomadis                 | Hebdomadis            | Hebdomadis            |
| <i>L. interrogans</i>    | <b>Australis</b>           | <b>Bratislava*</b>    | <b>Jez Bratislava</b> |
| <i>L. noguchii</i>       | Louisiana                  | Louisiana             | LSU 1945              |
| <i>L. noguchii</i>       | <b>Panama</b>              | <b>Panama*</b>        | <b>CZ 214 K</b>       |
| <i>L. borgpetersenii</i> | <b>Tarassovi</b>           | <b>Tarassovi*</b>     | <b>Perepelitsin</b>   |
| <i>L. borgpetersenii</i> | Ballum                     | Castellonis           | Castellon 3           |
| <i>L. borgpetersenii</i> | Ballum                     | Ballum                | Mus 127               |
| <i>L. borgpetersenii</i> | <b>Mini</b>                | <b>Mini*</b>          | <b>Sari</b>           |
| <i>L. weilii</i>         | Celledoni                  | Celledoni             | Celledoni             |
| <i>L. weilii</i>         | Javanica                   | Coxi                  | Cox                   |
| <i>L. kirschneri</i>     | <b>Cynopteri</b>           | <b>Cynopteri*</b>     | <b>3522C</b>          |
| <i>L. kirschneri</i>     | <b>Grippotyphosa</b>       | <b>Grippotyphosa*</b> | <b>Duyster</b>        |
| <i>L. santarosai</i>     | Shermani                   | Shermani              | 1342 K                |
| <i>L. santarosai</i>     | <b>Tarassovi</b>           | <b>ND*</b>            | <b>AIM</b>            |
| <i>L. santarosai</i>     | Tarassovi                  | ND                    | JET                   |
| <i>L. alexanderi</i>     | Manhao                     | Manhao 3              | L 60T                 |
| <i>L. alstoni</i>        | Ranarum                    | Pingchang             | 80-412T               |
| <i>L. kmetyi</i>         | <b>Tarassovi</b>           | <b>Malaysia*</b>      | <b>Bejo-Iso9</b>      |
| <i>L. mayottensis</i>    | ND                         | ND                    | 200901122             |
| <i>L. biflexa</i>        | Semaranga                  | Patoc                 | Patoc 1               |

\*Final selection of strains used for MAT evaluation of all human serum samples

**Table 2.** Multivariate analysis of seroprevalent cases of *Leptospira* among different serogroups (mixed-effects multinomial logistic regression model)

| <b>Variables</b>                                         | <b><i>L. interrogans</i> serogroup</b> | <b>Others <i>Leptospira</i> species serogroups</b> |
|----------------------------------------------------------|----------------------------------------|----------------------------------------------------|
|                                                          | <b>OR<sub>adjust</sub> (95%CI)</b>     | <b>OR<sub>adjust</sub> (95%CI)<sup>a</sup></b>     |
| <b>Individuals</b>                                       |                                        |                                                    |
| Outdoor occupation                                       | 2.06 (1.31-3.26)                       |                                                    |
| Male gender                                              | 2.34 (1.55-3.53)                       |                                                    |
| Age, years (1-15)                                        | 1.00                                   |                                                    |
| Age, years (>15-29)                                      | 2.52 (1.44-4.41)                       |                                                    |
| Age, years (>29-46)                                      | 1.72 (0.94-3.13)                       |                                                    |
| Age, years (>46)                                         | 1.95 (1.07-3.55)                       |                                                    |
| <b>Household characteristics</b>                         |                                        |                                                    |
| <b>Floor material</b>                                    |                                        |                                                    |
| Dirt soil                                                | 1.87 (1.21-2.89)                       |                                                    |
| <b>Public services in household</b>                      |                                        |                                                    |
| Presence of pit latrine                                  |                                        | 2.34 (1.27-4.32)                                   |
| <b>Presence of wild animals in peri domiciliary area</b> |                                        |                                                    |
| Opossum                                                  | 1.58 (1.11-2.23)                       |                                                    |
| <b>Animal husbandry purpose</b>                          |                                        |                                                    |
| Porcine (piglet)                                         | 1.66 (1.11-2.49)                       |                                                    |
| Turkeys (companionship)                                  |                                        | 4.99 (2.03-12.30)                                  |

<sup>a</sup> Adjusted by age, gender and outdoor occupation

**Table 3.** Multivariate analysis of seroincident cases of *Leptospira* among different serogroups (mixed-effects multinomial logistic regression model)

| <b>Variables</b>                             | <b><i>L. interrogans</i> serogroup</b>         | <b>Others <i>Leptospira</i> species serogroups</b> |
|----------------------------------------------|------------------------------------------------|----------------------------------------------------|
|                                              | <b>RR<sub>adjust</sub> (95%CI)<sup>a</sup></b> | <b>RR<sub>adjust</sub> (95%CI)<sup>b</sup></b>     |
| <b>Individuals</b>                           |                                                |                                                    |
| Outdoor occupation                           | 2.93 (1.36-6.16)                               |                                                    |
| Age (years)                                  | 1.02 (1.01-1.04)                               |                                                    |
| <b>Peri domiciliary area characteristics</b> |                                                |                                                    |
| <b>Vegetation</b>                            |                                                |                                                    |
| Corn culture                                 | 22.74 (5.75-51.74)                             |                                                    |
| Cassava culture                              |                                                | 3.05 (1.24-6.52)                                   |
| <b>Synanthropic mammals</b>                  |                                                |                                                    |
| Rats                                         | 2.81 (1.07-7.12)                               |                                                    |
| <b>Animal husbandry purpose</b>              |                                                |                                                    |
| Hunting canines                              |                                                | 6.17 (2.72-10.99)                                  |

<sup>a</sup> Adjusted by gender

<sup>b</sup> Adjusted by age, gender and outdoor occupation



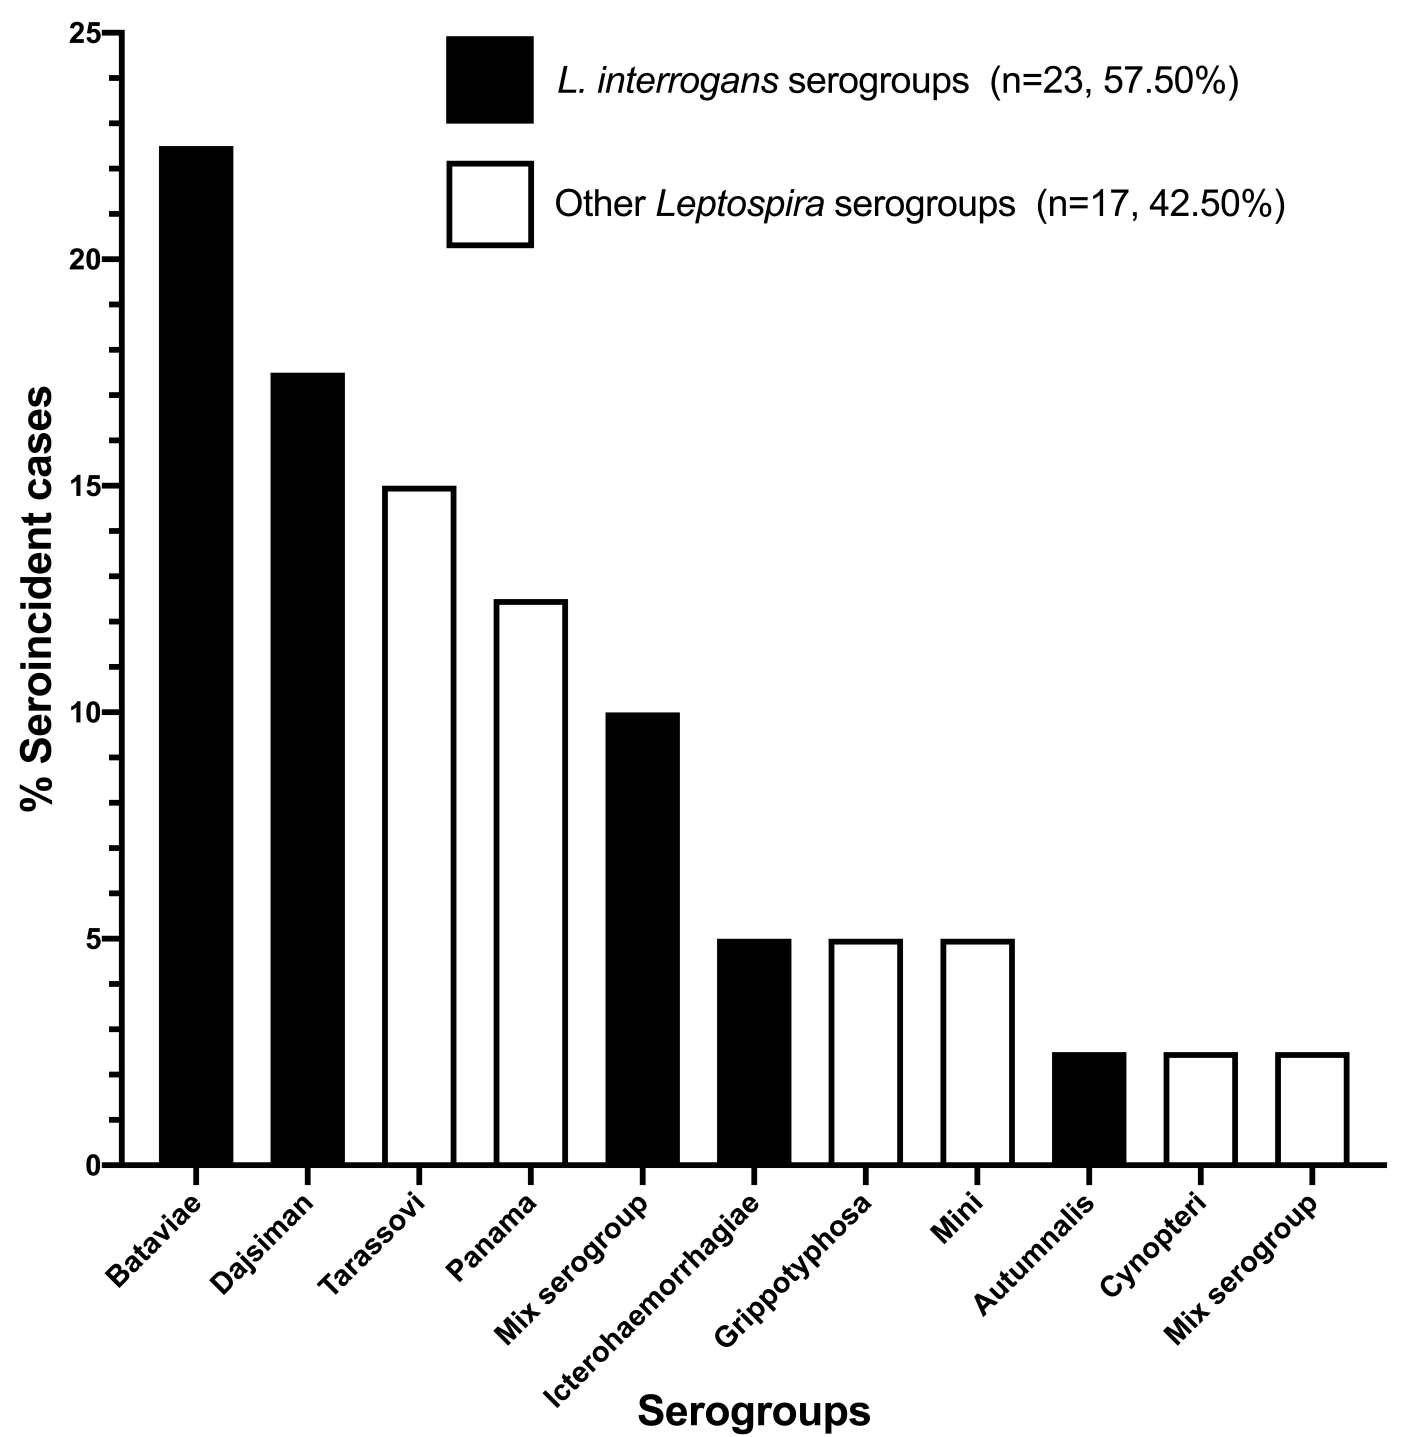

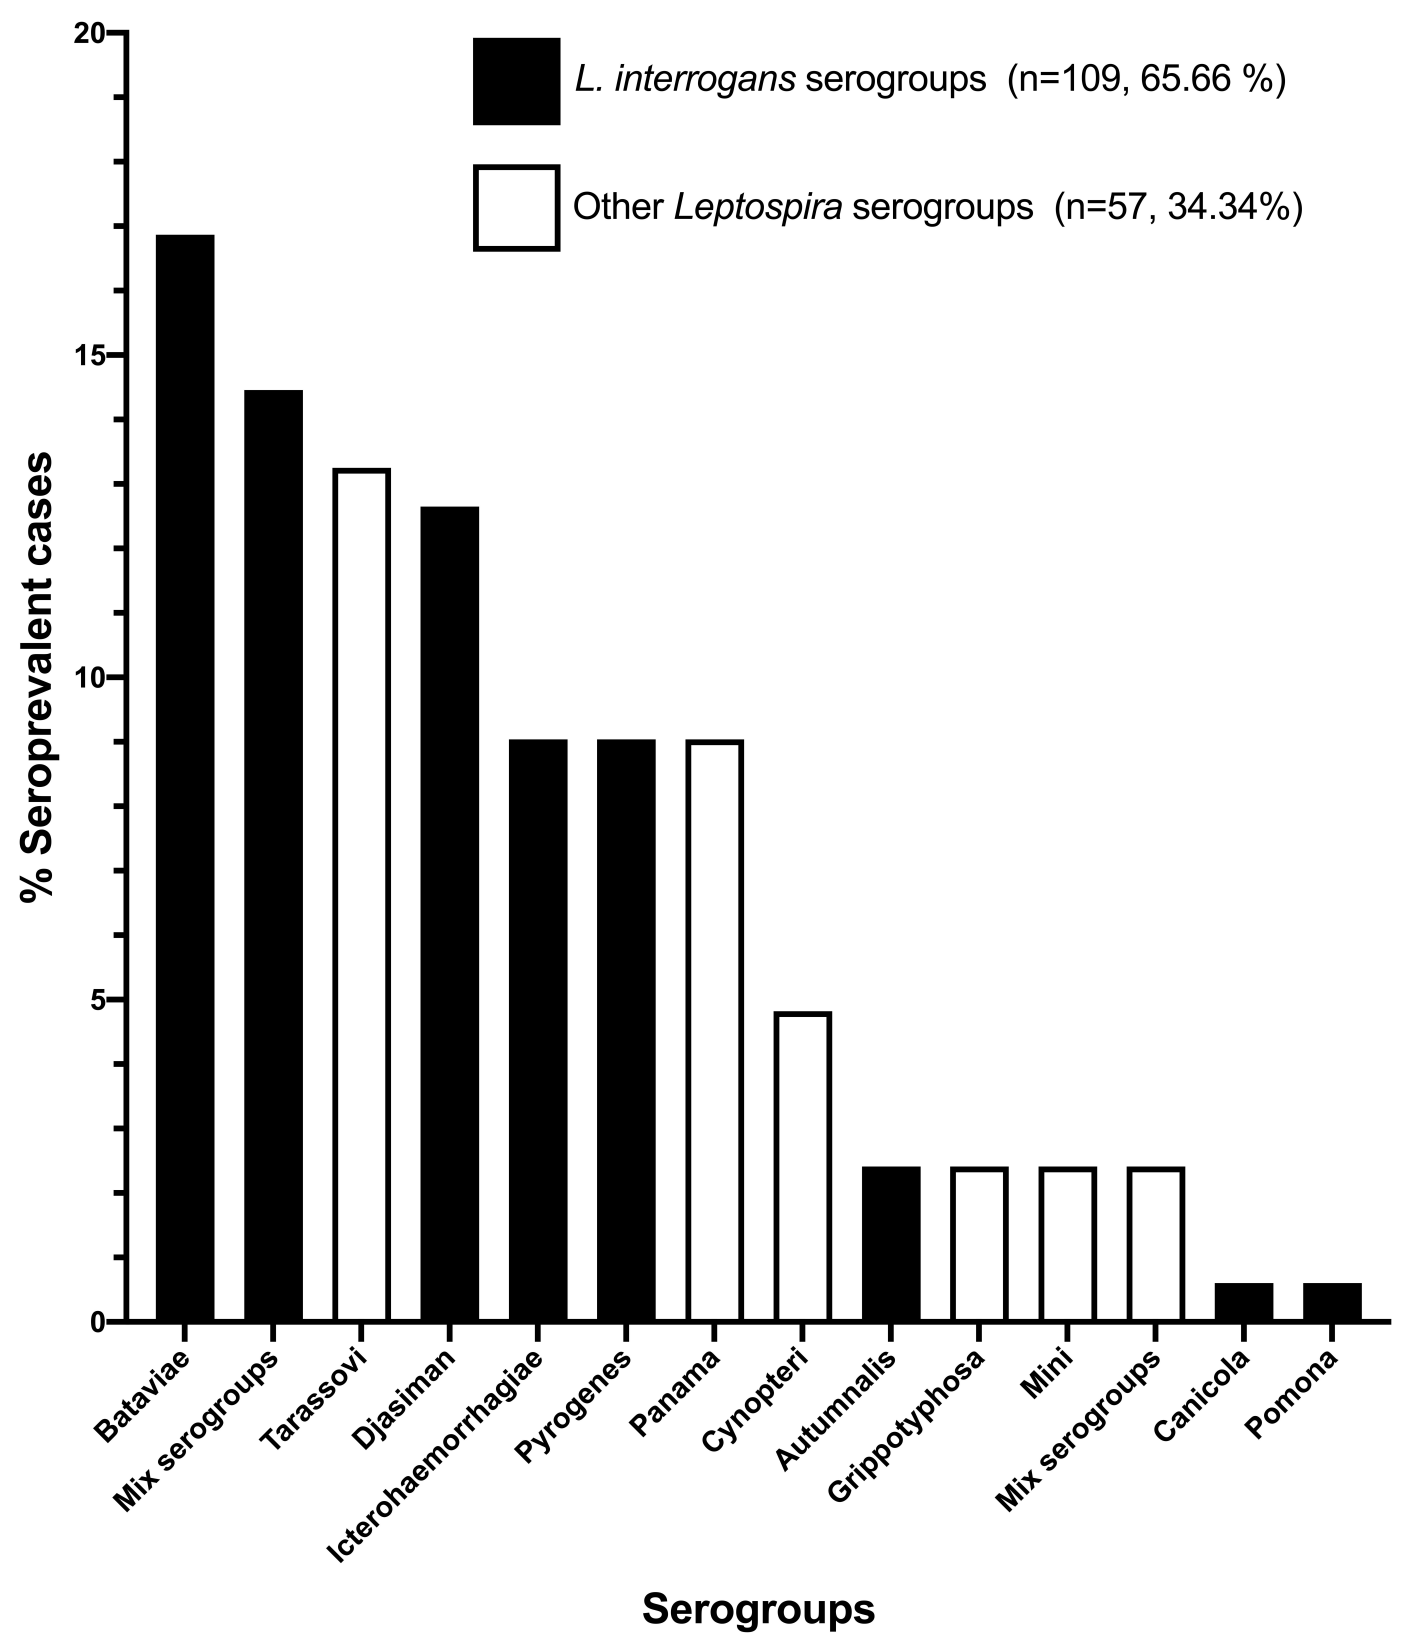

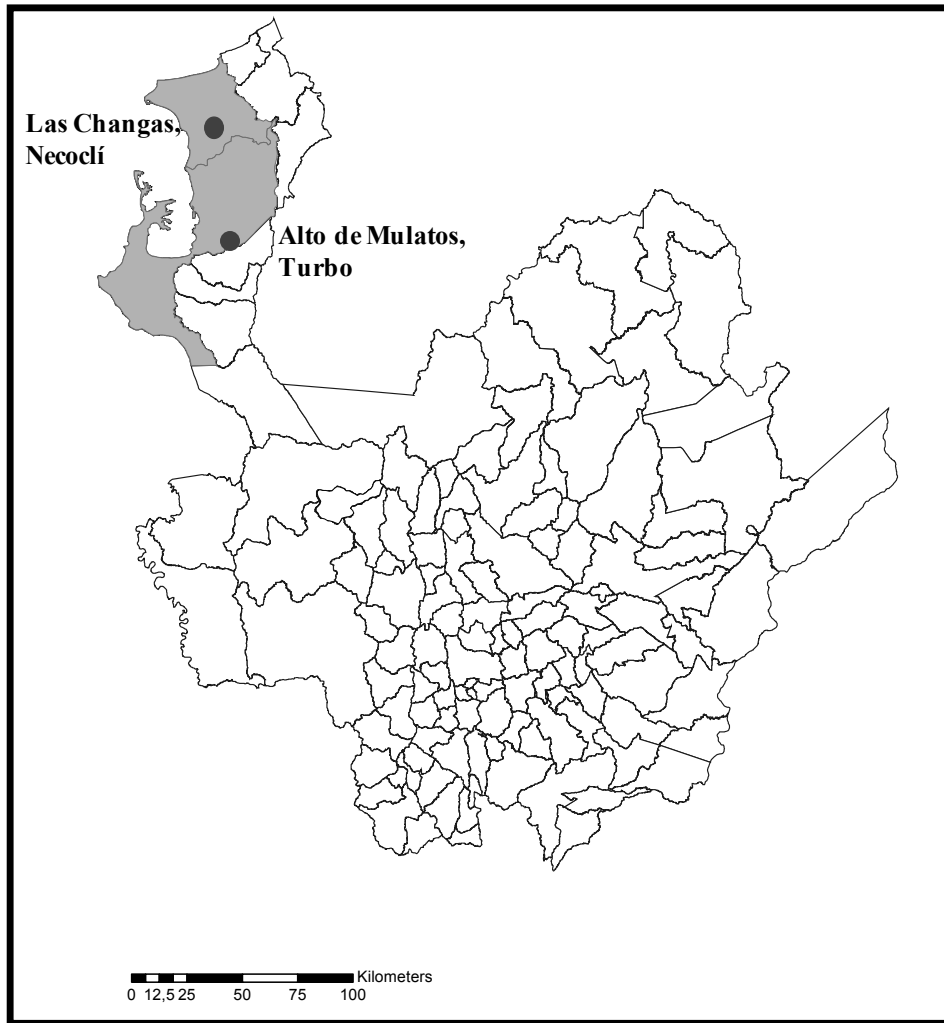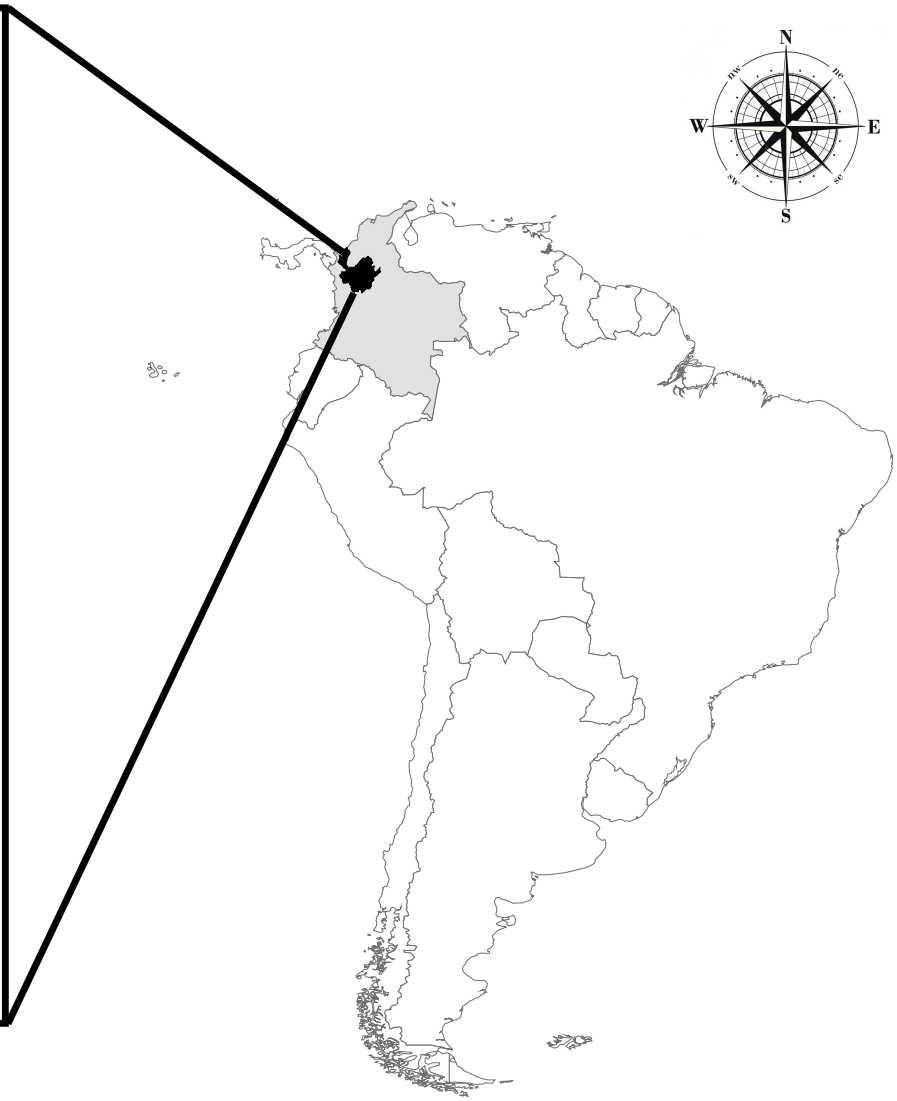

Source: https://medrxiv.org/content/10.1101/2021.10.23.21265419v1.full.pdf
